# Supplementary material for: Prognostic Factors for Mortality in Acute Mesenteric Ischemia
Source: MDPI journal article supplement (doi:10.3390/jcm11133619), 2022-06-23
Supplement: s1 [file s1]

Table S1. Sub-analysis for patients with arterial ischemia with respect to revascularization.

| Variables                             | Arterial ischemia (revascularized, n=63) | Arterial ischemia (not-revascularized, n=27) | p value |
|---------------------------------------|------------------------------------------|----------------------------------------------|---------|
| <b>Demographics</b>                   |                                          |                                              |         |
| Gender, m/f, n (%)                    | 24 (38.1)/39 (61.9)                      | 19 (70.4)/8 (29.6)                           | .005    |
| Age, years                            | 72 (62-79)                               | 81 (63-84)                                   | .047    |
| BMI, kg/m <sup>2</sup>                | 25.7 (22.6-29)                           | 24.2 (22.26.7)                               | .351    |
| ASA, n (%)                            |                                          |                                              | .625    |
| I                                     | 0                                        | 0                                            |         |
| II                                    | 6 (9.5)                                  | 2 (7.4)                                      |         |
| III                                   | 50 (79.4)                                | 20 (74.1)                                    |         |
| IV                                    | 7 (11.1)                                 | 5 (18.5)                                     |         |
| Etiology, n (%)                       |                                          |                                              | .002    |
| Embolic                               | 39 (61.9)                                | 9 (29.6)                                     |         |
| Thrombotic                            | 24 (38.1)                                | 13 (48.1)                                    |         |
| Compression                           | 0                                        | 4 (14.8)                                     |         |
| Dissection                            | 0                                        | 0                                            |         |
| Unknown                               | 0                                        | 1 (3.7)                                      |         |
| Occluded vessel, n (%)                |                                          |                                              | .000    |
| TC                                    | 1 (1.6)                                  | 1 (3.7)                                      |         |
| SMA                                   | 45 (71.4)                                | 14 (51.9)                                    |         |
| IMA                                   | 0                                        | 8 (29.6)                                     |         |
| TC+ SMA                               | 14 (22.2)                                | 2 (7.4)                                      |         |
| TC+ IMA                               | 2 (3.2)                                  | 0                                            |         |
| SMA+ IMA                              | 0                                        | 2 (7.4)                                      |         |
| TC+ SMA+ IMA                          | 1 (1.6)                                  | 0                                            |         |
| Location of occlusion, n (%)*         |                                          |                                              | .034    |
| Proximal                              | 47 (74.6)                                | 14 (51.8)                                    |         |
| Distal                                | 16 (25.4)                                | 13 (48.1)                                    |         |
| Referral from another hospital, n (%) | 27 (42.9)                                | 4 (14.8)                                     | .010    |
| <b>Radiological characteristics</b>   |                                          |                                              |         |
| Pneumatosis intestinalis, n (%)       | 6 (9.5)                                  | 7 (25.9)                                     | .080    |
| PMVG, n (%)                           | 2 (3.2)                                  | 3 (11.1)                                     | .184    |
| Bowel distension, n (%)               | 23 (36.5)                                | 9 (33.3)                                     | .459    |
| Bowel wall thickening, n (%)          | 29 (46)                                  | 13 (48.1)                                    | .697    |
| Pneumoperitoneum, n (%)               | 3 (4.8)                                  | 3 (11.1)                                     | .355    |
| Ascites, n (%)                        | 8 (12.7)                                 | 5 (18.5)                                     | .643    |
| <b>Preoperative laboratory values</b> |                                          |                                              |         |
| Leukocytes, 1/nl                      | 16 (11.4-23.4)                           | 11.9 (8.7-18.2)                              | .090    |
| C-Reactive-Protein, mg/l              | 137.5 (24.4-230)                         | 141 (36.7-258.5)                             | .804    |
| Hemoglobin, g/dl                      | 12.1 (10.9-14)                           | 12.1 (10.5-14.1)                             | .836    |
| Thrombocytes, 1/nl                    | 259 (167-354)                            | 242 (159-282)                                | .315    |
| Prothrombin time, %                   | 74.5 (51-96.50)                          | 71.5 (56.8-78.3)                             | .310    |
| INR                                   | 1.17 (1.02-1.56)                         | 1.25 (1.14-1.45)                             | .194    |
| Bilirubin, mg/dl                      | .74 (.5-1.14)                            | .59 (.36-.97)                                | .174    |
| AP, U/l                               | 87 (67.5-104.5)                          | 86 (65-108)                                  | .908    |
| GGT, U/l                              | 37 (24-65.5)                             | 46 (22-122)                                  | .577    |
| Albumin, g/dl                         | 3 (1.9-3.6)                              | 3.5 (3.1-5.2)                                | .130    |
| AST, U/l                              | 40 (26-111)                              | 31 (20-45.5)                                 | .041    |
| ALT, U/l                              | 38 (25-316)                              | 17 (14-28)                                   | .002    |
| Creatinine, mg/dl                     | 1.04 (0.8-1.5)                           | 2.3 (1.57-3.4)                               | .000    |
| Lactate, mmol/l                       | 2.9 (1.6-5.9)                            | 3.3 (1.9-5.1)                                | .610    |
| <b>Therapy Characteristics</b>        |                                          |                                              |         |
| Extent of bowel-resection, n (%)      |                                          |                                              | .001    |
| Small Bowel                           | 24 (38.1)                                | 4 (14.8)                                     |         |

|                                         |               |               |      |
|-----------------------------------------|---------------|---------------|------|
| Colon                                   | 10 (15.9)     | 17 (63)       |      |
| Small Bowel and Colon                   | 14 (22.2)     | 6 (22.2)      |      |
| No Resection                            | 11 (17.5)     | 0             |      |
| Fatal                                   | 4 (6.3)       | 0             |      |
| Technique of revascularization, n (%)   |               |               |      |
| Endovascular                            | 23 (36.5)     |               |      |
| Open                                    | 36 (57.1)     |               |      |
| Thrombectomy                            | 26 (41.3)     |               |      |
| Bypass, prosthetic, antegrade           | 4 (6.3)       |               |      |
| Bypass, prosthetic, retrograde          | 4 (6.3)       |               |      |
| Bypass, autologous vein, retrograde     | 2 (3.17)      |               |      |
| Combination                             | 4 (6.3)       |               |      |
| Sequence of therapy                     |               |               |      |
| Revascularization before resection      | 17 (27)       |               |      |
| Resection before revascularization      | 13 (20.6)     |               |      |
| Simultaneous                            | 18 (28.6)     |               |      |
| Enterostomy, n (%)                      | 42 (66.6)     | 26 (96.3)     | .008 |
| Primary bowel anastomosis, n (%)        | 6 (9.5)       | 1 (3.7)       | .345 |
| Intraoperative FFP transfusion, n (%)   | 8 (12.7)      | 3 (11.1)      | .813 |
| Intraoperative blood transfusion, n (%) | 23 (36.5)     | 13 (48.1)     | .329 |
| Primary treatment time, minutes         | 152 (120-205) | 127 (115-173) | .132 |
| Time to treatment, minutes              | 160 (95-261)  | 215 (152-346) | .027 |
| Intensive care stay, days               | 6 (2-15)      | 4             | .849 |
| <b>Postoperative data</b>               |               |               |      |
| Postoperative complications, n (%)      |               |               |      |
| Clavien-Dindo > IIIa                    | 59 (93.7)     | 22 (81.5)     | .343 |
| Inhospital mortality                    | 33 (52.4)     | 14 (51.9)     | .963 |

Patients deemed palliative during initial exploration were excluded from the analysis. Data presented as median and interquartile range, if not noted otherwise.

\*Vessel occlusions proximal from the first branch of the vessel were defined as “proximal”, while occlusions distal to the first branch were defined as “distal”. ALT, alanine aminotransferase; AP, alkaline phosphatase; ASA, American society of anesthesiologists classification; AST, aspartate aminotransferase; BMI, body mass index; CCI, comprehensive complication index; FFP, fresh frozen plasma; GGT, gamma glutamyltransferase; IMA; inferior mesenteric artery; INR, international normalized ratio; PMVG, portomesenteric vein gas; SMA, superior mesenteric artery; TC, celiac trunk
